# Supplementary material for: Telemedicine in Chronic Wound Management: Systematic Review And Meta-Analysis
Source: PubMed Central journal article supplement (PMC7381084; doi:10.2196/15574), 2020-06-25
Supplement: mhealth_v8i6e15574_app5.pdf [file mhealth_v8i6e15574_app5.pdf]

Multimedia Appendix 5\_ Risk of bias of cohort studies by the use of ROBINS-I

|                          | <b>Bias due to confounding</b> | <b>Selection bias</b> | <b>Bias in classification of interventions</b> | <b>Bias due to deviations from intended interventions</b> | <b>Bias due to missing data</b> | <b>Bias in measurement of outcomes</b> | <b>Bias in selection of the reported result</b> | <b>Overall bias</b> |
|--------------------------|--------------------------------|-----------------------|------------------------------------------------|-----------------------------------------------------------|---------------------------------|----------------------------------------|-------------------------------------------------|---------------------|
| Bergersen 2016           | Moderate                       | Low                   | Low                                            | Low                                                       | Moderate                        | Low                                    | Moderate                                        | Moderate            |
| Gamus 2019               | Moderate                       | Serious               | Low                                            | Moderate                                                  | Serious                         | Low                                    | Low                                             | Serious             |
| Le Goff-<br>Pronost 2018 | Serious                        | Low                   | Low                                            | Low                                                       | Moderate                        | Low                                    | Moderate                                        | Serious             |
| Wickstrom<br>2018        | Serious                        | Low                   | Low                                            | Low                                                       | Moderate                        | Low                                    | Moderate                                        | Serious             |
| wilbright 2004           | Serious                        | Low                   | Low                                            | Low                                                       | Moderate                        | Low                                    | Moderate                                        | Serious             |
| Zarchi 2015              | Moderate                       | Low                   | Low                                            | Low                                                       | Moderate                        | Low                                    | Low                                             | Moderate            |
